# Supplementary material for: The B & B approach: Ball-milling conjugation of dextran with phenylboronic acid (PBA)-functionalized BODIPY
Source: publisher site journal article supplement (doi:10.3762/bjoc.16.188), 2020-09-11
Supplement: Additional file 1 [file 1860-5397-16-188-S1.pdf]

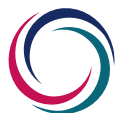

## Supporting Information

for

### **The B & B approach: Ball-milling conjugation of dextran with phenylboronic acid (PBA)-functionalized BODIPY**

Patrizia Andreozzi, Lorenza Tamberi, Elisamaria Tasca, Gina Elena Giacomazzo, Marta Martinez, Mirko Severi, Marco Marradi, Stefano Cicchi, Sergio Moya, Giacomo Biagiotti and Barbara Richichi

*Beilstein J. Org. Chem.* **2020**, *16*, 2272–2281. doi:10.3762/bjoc.16.188

**Methods for UV–vis and fluorescence measurements, UV–vis and fluorescence spectra of Dex-1b, Dex-1c, and 1 in DMSO, FTIR spectra of PBA-BODIPY 1, dextran and Dex-1a–d; MTT assay and correlation coefficient of Dex-1b**

## Table of contents

|                                             |           |
|---------------------------------------------|-----------|
| <b>UV-vis and fluorescence measurements</b> | <b>S2</b> |
| <b>Figure S1</b>                            | <b>S2</b> |
| <b>Figure S2</b>                            | <b>S3</b> |
| <b>Figure S3</b>                            | <b>S3</b> |
| <b>Figure S4</b>                            | <b>S4</b> |
| <b>Figure S5</b>                            | <b>S4</b> |
| <b>Figure S6</b>                            | <b>S5</b> |
| <b>Figure S7</b>                            | <b>S5</b> |
| <b>Figure S8</b>                            | <b>S6</b> |
| <b>Figure S9</b>                            | <b>S6</b> |
| <b>Figure S10</b>                           | <b>S7</b> |
| <b>Figure S11</b>                           | <b>S7</b> |
| <b>Figure S12</b>                           | <b>S8</b> |

## UV-vis and fluorescence measurements

The amount of unconjugated dye in the ethanol washing solutions was analyzed as follows: the ethanol filtrate was concentrated to dryness, then, the filtrate was dissolved in DMSO in a volumetric flask and the absorbance (Abs) of the obtained solutions at  $\lambda_{\max} = 508\text{--}514\text{ nm}$  was measured.

### Detailed dilution protocol

Washing solutions of **Dex-1a** were diluted as follow using DMSO:

- DMSO solution was firstly diluted to 50 mL, then 1 mL of this solution was diluted to 50 mL.
- The filtrate related to the first washing solution was dissolved in 100 mL.
- The filtrate related to the second washing solution was dissolved in 50 mL.

Washing solutions of **Dex-1b-c** were diluted as follow using DMSO:

- DMSO solution was firstly diluted to 50 mL, then 1 mL of this solution was diluted to 50 mL.
- The filtrate related to the first washing solution was dissolved in 100 mL.
- The filtrate related to the second washing solution was dissolved in 20 mL.

For the dilution curves a note amount of BODIPY-Dex was dissolved in a note amount of water and dilutions were prepared from the stock solution.

Fluorescence spectra were recorded at  $\lambda_{\text{exc}} = 380\text{ nm}$  or  $\lambda_{\text{exc}} = 460\text{ nm}$ .

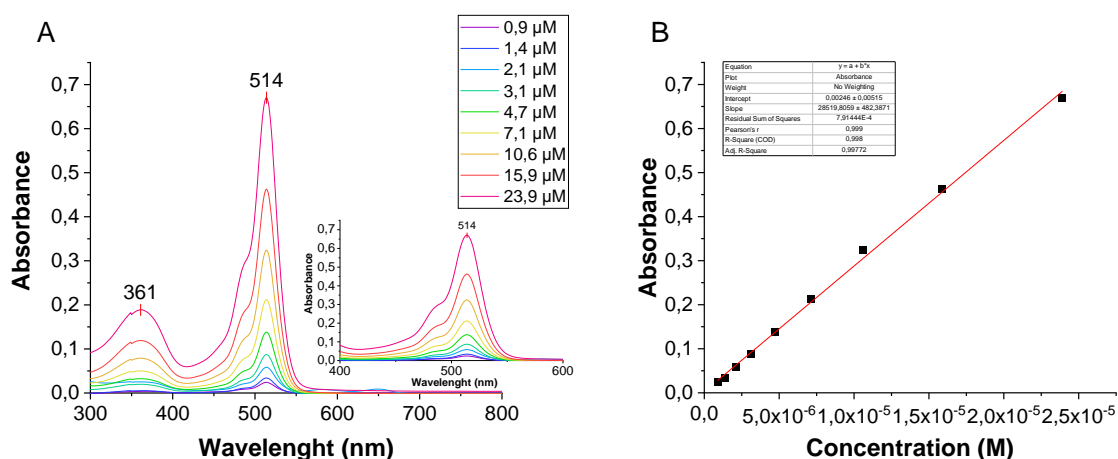

**Figure S1:** A. UV-vis absorbance spectra of PBA-BODIPY 1 in DMSO; B. Evaluation of the molar extinction coefficient of PBA-BODIPY 1 in DMSO.

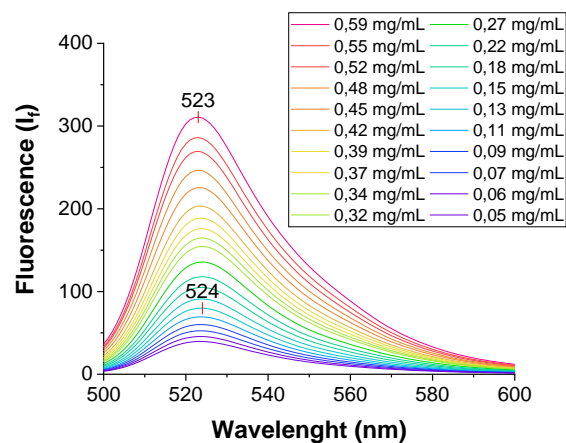

**Figure S2:** Fluorescence emission spectra of **Dex-1b** ( $\lambda_{\text{exc}} = 460$  nm) in water.

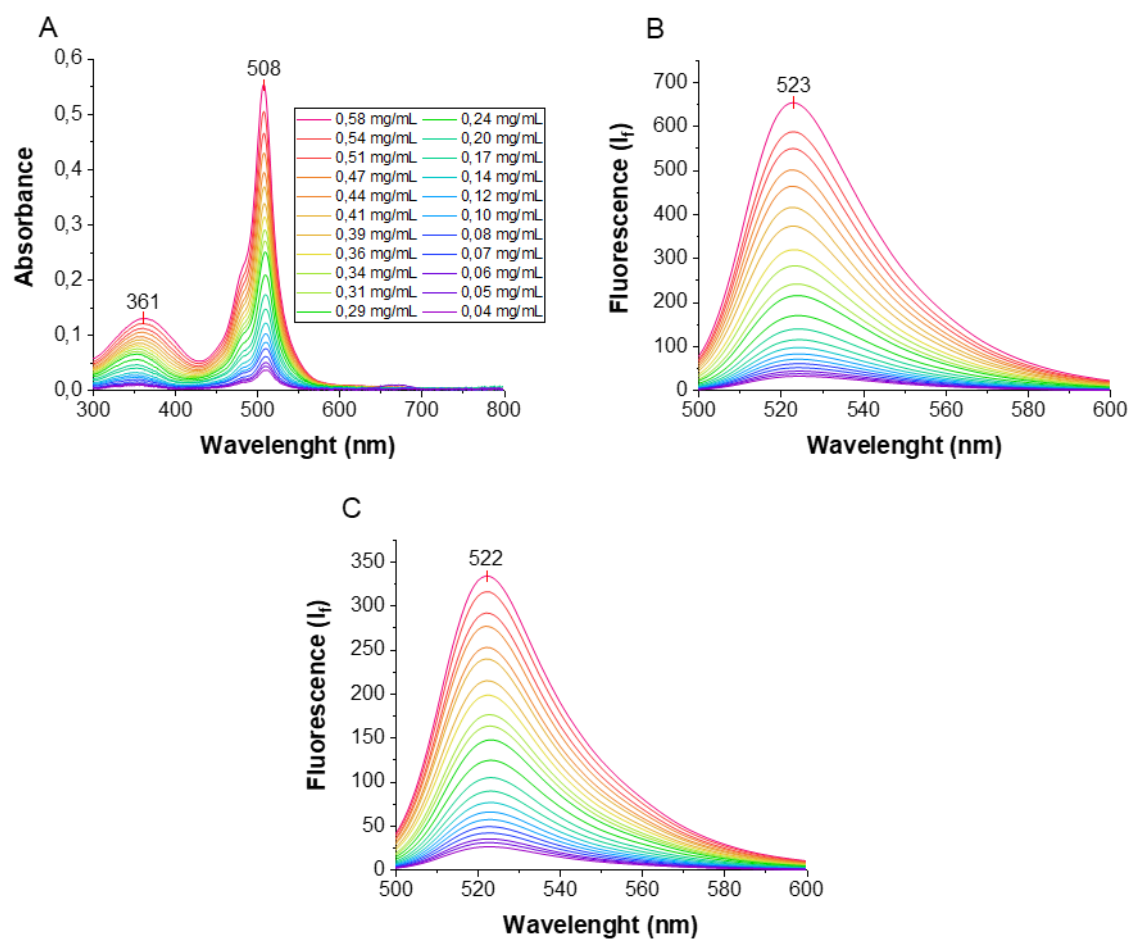

**Figure S3:** A. UV-vis absorbance spectra and B and C. Fluorescence spectra ( $\lambda_{\text{exc}} = 380$  nm B and  $\lambda_{\text{exc}} = 460$  nm C) of **Dex-1c** solution in water.

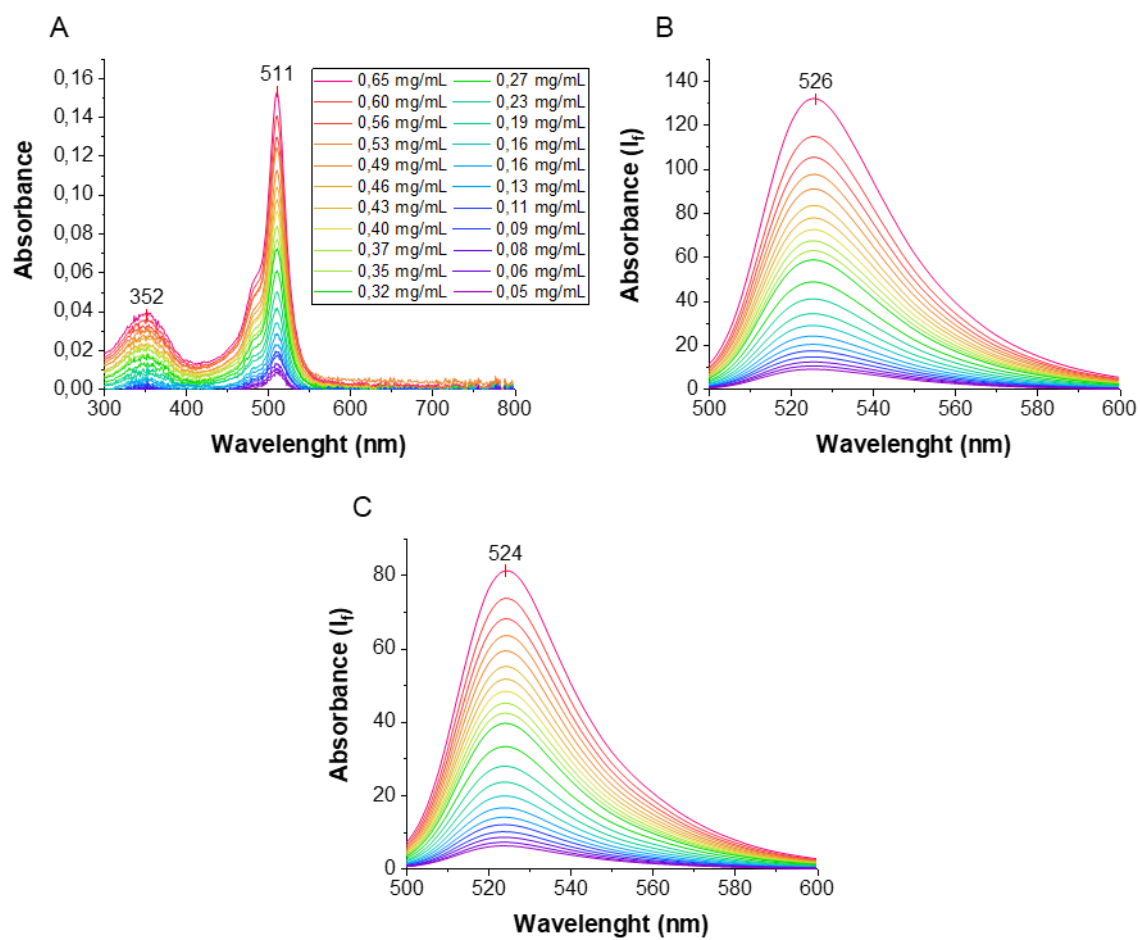

**Figure S4:** A. UV-vis absorbance spectra and B and C. Fluorescence spectra ( $\lambda_{\text{exc}} = 380$  nm B and  $\lambda_{\text{exc}} = 460$  nm C) of **Dex-1d** solution in water.

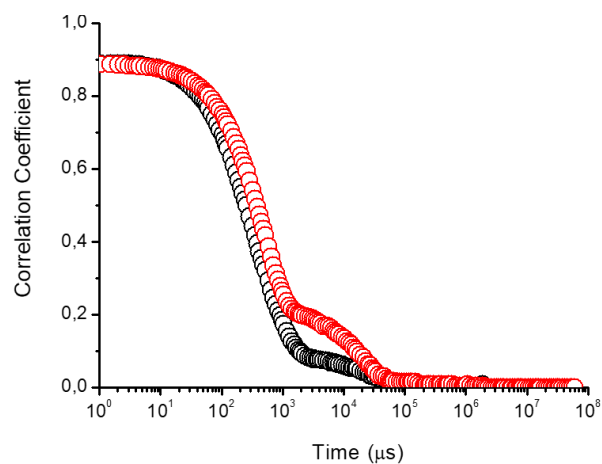

**Figure S5:** Correlation coefficient by DLS measurements of the conjugate **Dex-1b** (1.0 mg/mL) dispersed in H<sub>2</sub>O (black curve) and PBS (red curve).

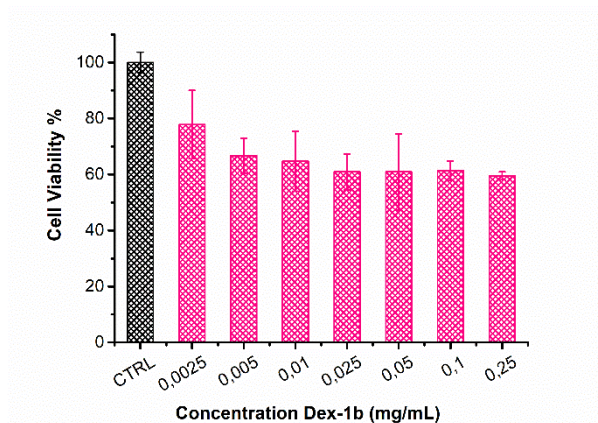

**Figure S6:** Percentage of cell viability of A549 cells after 24 hours of exposure at various concentrations of the conjugate **Dex-1b** reported as mg/mL concentration of functionalized polymer.

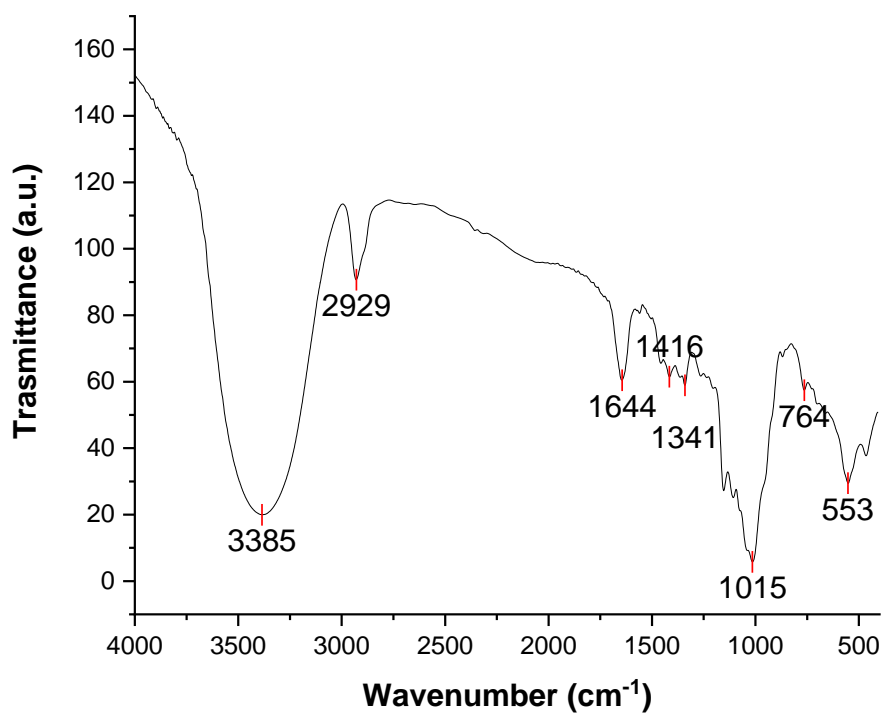

**Figure S7:** FTIR spectrum of **Dex-1a**.

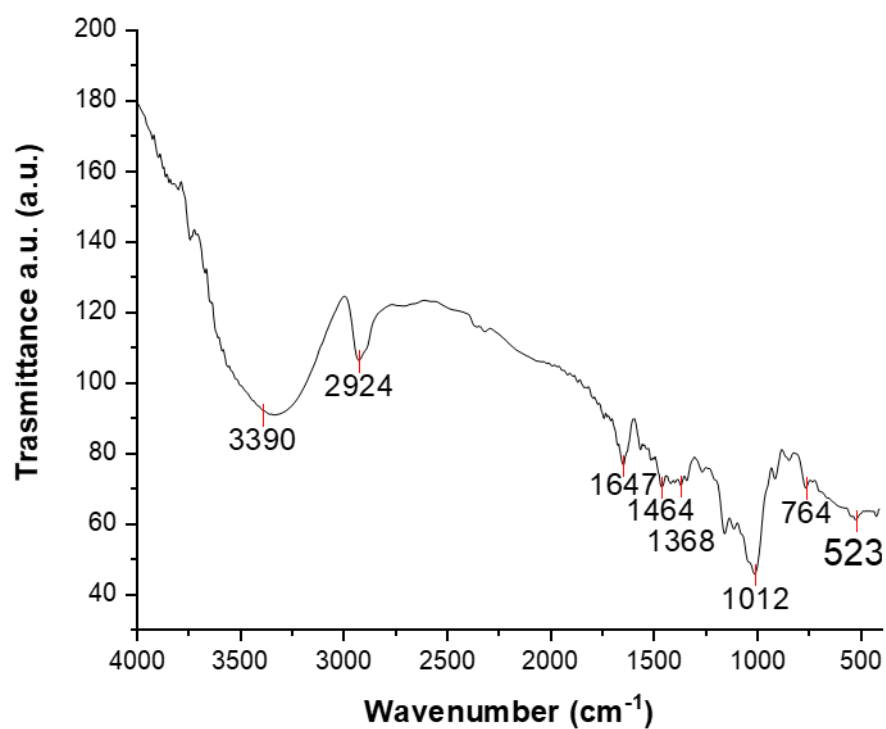

**Figure S8:** FTIR spectrum **Dex-1b**.

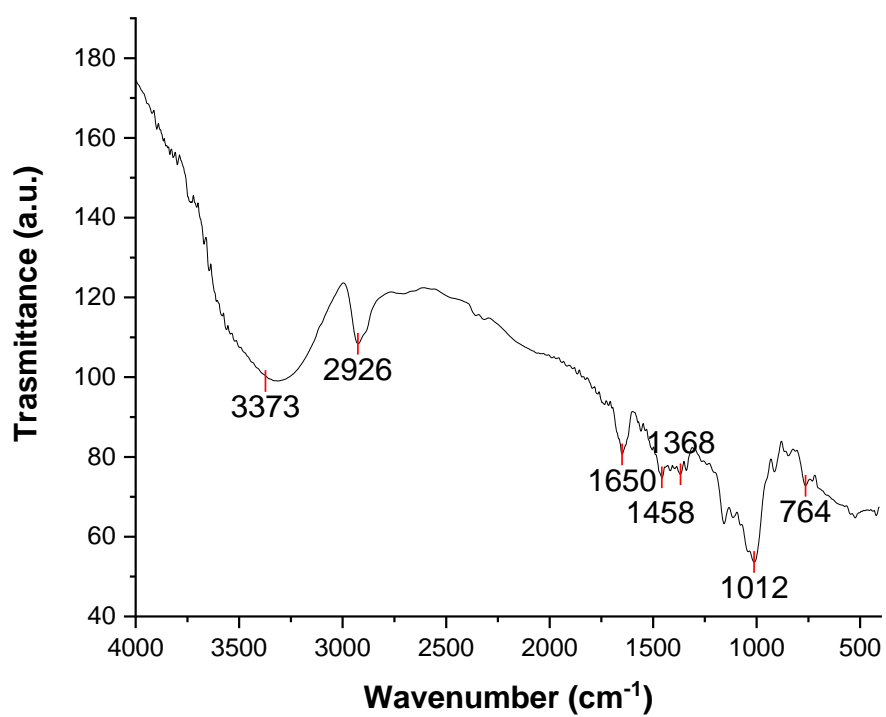

**Figure S9:** FTIR spectrum of **Dex-1b**.

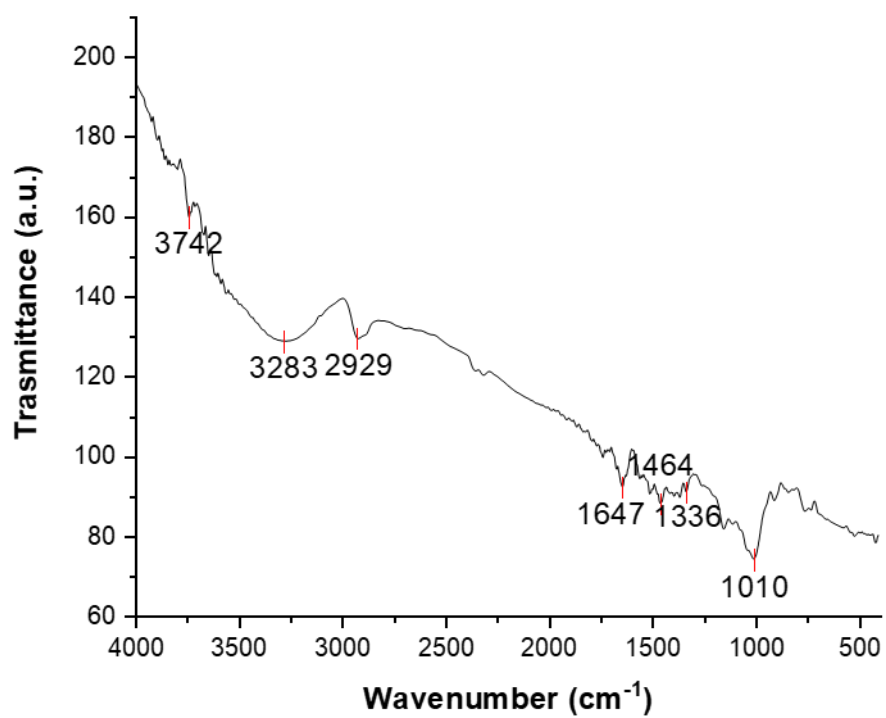

**Figure S10:** FTIR spectrum of **Dex-1d**.

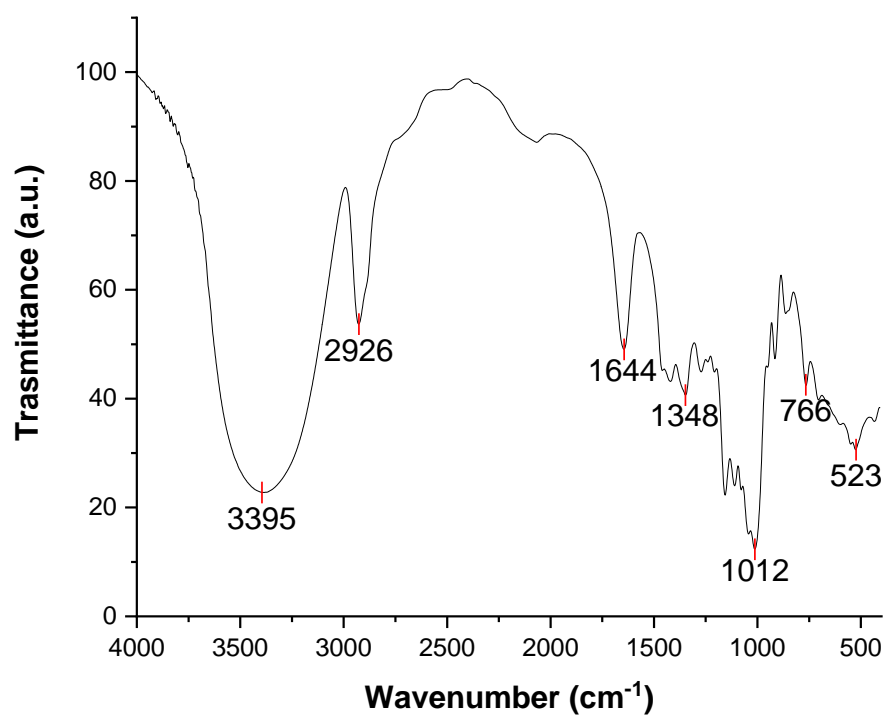

**Figure S11:** FTIR spectrum of dextran.



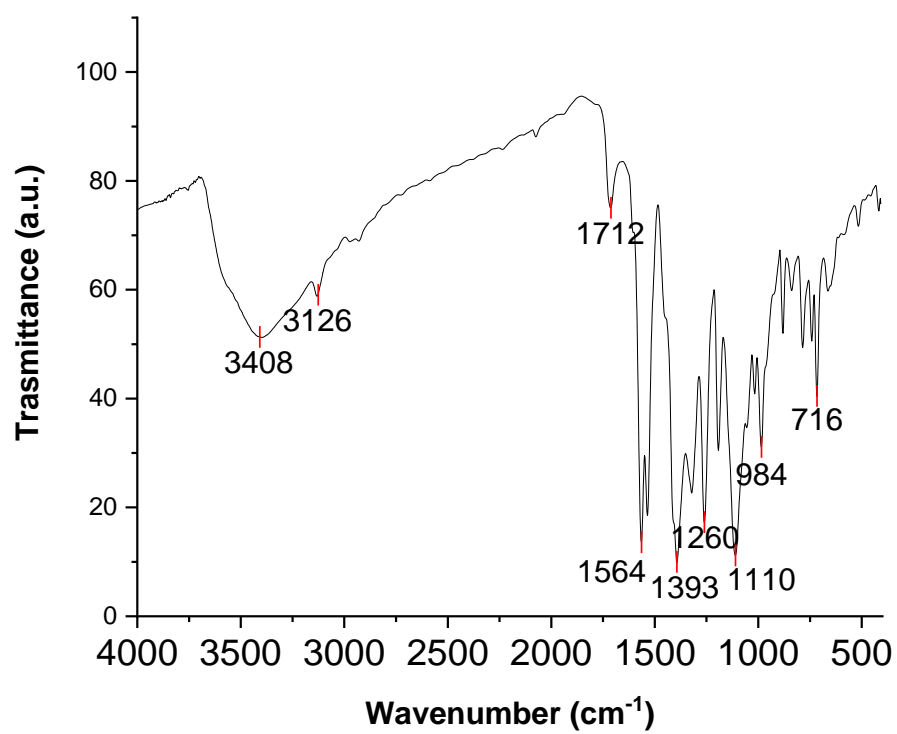

**Figure S12:** FTIR PBA-BODIPY 1.
